# Supplementary material for: C. elegans neurons have functional dendritic spines
Source: eLife. 2019 Oct 4;8:e47918. doi: 10.7554/eLife.47918 (PMC6802951; doi:10.7554/eLife.47918)
Supplement: Figure 1—figure supplement 1—source data 1. [file elife-47918-fig1-figsupp1-data1.xlsx]

## Sheet: Sheet1
thin	filopodium	stubby	branched
53.3333	13.3333	16.6667	16.6667
36	8	40	16
74.0741	3.7037	14.8148	7.40741
22.2222	22.2222	33.3333	22.2222
53.5714	3.57143	28.5714	14.2857
54.1667	4.16667	20.8333	20.8333
41.1765	23.5294	5.88235	29.4118
52.3809	14.2857	19.0476	14.2857
57.1429	19.0476	9.52381	14.2857
67.5	2.5	12.5	17.5
75	8.33333	0	16.6667
45.4545	27.2727	9.09091	18.1818
66.6667	6.66667	13.3333	13.3333
72.7273	0	22.7273	4.54545
63.3333	0	23.3333	13.3333
53.8462	7.69231	30.7692	7.69231
