# Supplementary material for: C. elegans neurons have functional dendritic spines
Source: eLife. 2019 Oct 4;8:e47918. doi: 10.7554/eLife.47918 (PMC6802951; doi:10.7554/eLife.47918)
Supplement: Figure 1—source data 1. [file elife-47918-fig1-data1.xlsx]

## Sheet: by marker
Cytosolic	LifeAct::GFP	myr::mRuby
5.0396	3.30932	2.05184
3.78072	2.77186	2.31071
3.64494	2.72076	2.35595
3.30312	4.71712	2.42613
3.62111	3.18784	4.23601
2.98894	4.46803	2.42982
4.70721	3.40378	3.42749
3.81503	1.75975	2.44089
4.15118	3.80792	2.93282
2.32159	2.38923	3.35709
2.9275	2.9882	3.8486
4.33547	3.02463	2.88172
3.91435	4.15319	2.05071
6.02628	5.36215	3.74289
4.67719	4.82374	2.84935
2.79521		3.735
4.11239	4.34493	4.04459
3.56809	3.51158	4.63328
2.53312	4.52261	3.02824
3.22021	2.29008	2.94022
	4.4164	2.61309
3.68438	6.20155	3.83689
3.49805	4.18719	3.38092
2.71604	4.66667	2.66128
4.56371	3.66492	4.7578
2.82297	6.48298	2.20022
5.3053	5.44218	2.43572
2.42281	3.35366
3.82364	3.53774
3.73955	3.82609
3.37864	5.34759
2.90996	4.01235
3.27522
3.94292	3.10128
2.70321	2.9168
4.6775	2.62186
4.02849	3.10803
3.26177	2.63137
3.78885	2.07346
3.23329	4.00101
4.09601	3.88094
	2.17136
	2.7962
	2.07486
	2.45626
	2.02195
	2.97177
	2.48834
	1.99957
	2.10448
	1.62691
	2.68197
	4.82711
	2.50698
	2.15404
	3.34517
3.68389	3.4307	3.09664
0.815761	1.14978	0.784889
