# Supplementary material for: C. elegans neurons have functional dendritic spines
Source: eLife. 2019 Oct 4;8:e47918. doi: 10.7554/eLife.47918 (PMC6802951; doi:10.7554/eLife.47918)
Supplement: Figure 1—source data 2. [file elife-47918-fig1-data2.xlsx]

## Sheet: Tip Shaft Ratio
Cytosolic	LifeAct::GFP
0.866739	1.29709
0.960677	1.04149
0.952049	0.913976
0.852761	0.896767
0.926261	0.922651
0.948511	0.899695
0.939164	1.03463
0.944809	1.31299
0.964666	0.947975
0.932657	0.998044
0.972084	1.03758
0.918278	1.10543
0.954501	0.861628
0.917775	1.02897
0.953969	1.03998
0.903958	1.03703
0.952805	1.04713
1.00139	0.98604
0.916671	0.960269
0.81842	1.03054
0.720319	0.981138
0.946027	0.995423
1.08584	1.03338
0.7973	0.964347
0.820982	0.984493
1.02489	1.03621
1.05434	0.98314
1.03176	0.986534
0.996329	0.943307
0.897957	0.999919
0.893121	1.04151
0.868721	0.98642
0.742597	1.18213
0.80492	1.00157
0.793006	1.00145
0.754044	1.04796
1.03634	1.05794
0.665631	0.978148
0.562748	1.00046
0.719358	1.00955
0.715735	1.00815
0.820218	1.02417
0.78098	1.08915
0.752776	0.976815
0.895251	1.00072
0.941015	1.01995
0.563335	1.03848
0.544993	1.02442
0.55938	1.09578
0.52833	1.10637
0.788624	1.02159
1.0715	1.0158
0.700489	0.994599
0.805843	1.03215
0.78953	1.09701
0.97367	1.0269
0.489083	0.982325
0.752434	1.14066
0.629816	1.06518
0.684617	1.02605
0.680955	1.00387
0.767037	1.03633
0.897753	1.03885
0.968829	0.939391
0.845633	1.06033
0.81277	0.924481
0.84238	1.02012
0.715801	1.09574
0.909524	0.994796
0.834559	1.04919
0.855019	0.947248
0.767327	1.00266
0.806086	1.02932
1.00358	1.1513
0.826078	1.06126
0.811242	1.00741
0.796302	1.0554
0.806977	1.11989
0.82149	0.992068
0.553625	0.987424
0.67927	1.07925
0.780842	1.02974
0.774353	1.12083
0.944806	0.980065
0.878321	1.07411
0.874333	1.04059
0.902509	1.04
0.827851	1.05793
1.0481	1.03958
0.905969	1.00604
0.616663	1.02182
0.817477	1.02875
0.887227	1.03131
0.808296	1.08339
0.757949	1.0737
0.848555	1.05408
0.718862	1.02683
0.736913	1.04256
0.649622	1.11126
0.591589	1.05026
0.605195	1.08845
0.898412	1.01006
0.550246	1.01959
0.713316	1.01172
0.859949	1.00921
0.709522	1.01878
0.670372	1.0081
0.578299	1.00774
0.447169	1.01726
0.48479	1.02717
1.01062	1.01699
0.930497	1.00375
0.918629	1.00749
0.927114	1.01954
0.968189	1.02942
0.95623	1.03205
0.975935	1.02345
0.936432	1.02132
0.986432	1.02026
0.810955	1.0204
0.900939	1.00956
0.923319	0.997549
0.884949	1.00254
0.92639	1.01736
0.869061	1.02659
0.924944	1.01842
0.905345	0.994531
0.90271	0.83225
0.922636	1.0761
0.903931	0.977994
0.90675	0.916311
0.879862	1.54932
0.960176	0.991753
0.92231	1.08216
0.956324	0.981574
0.928855	1.0166
0.949681	1.04857
0.97471	1.07243
0.929459	1.03088
0.971946	1.03304
0.881186	1.03894
0.911192	1.01754
0.960122	1.02967
0.942929	1.06536
1.00032	1.06865
0.875898	1.05579
0.855722	1.04852
0.928517	1.05144
0.937975	1.04602
0.99937	1.01277
0.834649	1.0264
0.902034	1.02066
0.942198	1.02317
1.02761	1.00391
0.97138	1.00085
0.810657	1.00138
0.921484	1.0107
0.946657	1.01353
0.935517	1.02985
1.00825	1.0023
0.844728	1.02542
0.967186	0.99778
0.970517	0.991255
0.891185	1.11333
0.899024	1.49858
0.913864	0.943445
0.782032	1.4677
0.823855	0.981668
0.753271	0.952205
0.945939	0.96276
0.780788	1.00999
0.912353	0.857194
0.713051	1.0367
0.638504	0.829773
0.730725	1.10596
0.97889	0.998356
0.719281	0.818753
0.8716	1.07622
0.892571	0.724815
0.921385	1.13248
0.87763	0.827017
0.976779	0.970415
0.730293	0.93404
0.720455	0.991905
0.815124	0.961048
0.643093	1.11766
0.815853	1.01686
1.02515	1.14271
0.804151	1.05085
0.928961	1.01724
0.794956	0.988187
0.70795	1.15081
0.854478	1.20768
0.94919	0.960252
0.91469	0.902034
0.867368	0.769334
0.680849	0.92263
0.938849	0.972091
0.977494	1.08542
0.9561	1.01957
0.990105	1.2546
0.880467	1.00864
0.770971	1.00615
0.76961	1.09184
0.881981	1.17164
0.806059	1.15297
0.826047	1.26226
0.881489	1.20819
0.924682	0.984467
0.989878	1.1054
0.604479	1.04403
0.772139	1.29359
0.757923	0.992947
0.661717	0.995036
0.730685	0.933295
0.679793	0.9381
0.809466	0.915704
0.655243	1.11108
0.685315	1.16186
0.746875	1.13587
0.684663	1.15872
0.613683	1.00176
0.556677	1.09289
0.716121	0.926298
0.892125	0.968732
0.817167	1.01758
0.948168	1.00138
0.796306	1.077
0.928809	0.975261
0.799381	1.02917
0.813804	1.13029
0.921148	0.940096
0.799572	1.12033
1.01018	1.14173
1.02382	1.08007
0.997204	1.05788
0.96663	1.09932
0.858981	1.02459
0.824457	0.985877
0.813738	1.07333
0.917829	1.03223
0.83645	1.10884
0.922868	1.02326
0.979121	1.0637
0.866461	0.995676
1.01964	1.16118
0.794856	1.05828
0.890737	1.07168
0.872278	1.18825
0.803685	1.06504
0.897876	0.968083
0.772949	1.04598
0.801393	1.00721
0.983502	1.0001
0.781709	1.12317
1.0347	1.07118
0.754375	1.05371
0.725769	1.02128
0.886992	1.07745
0.757394	1.18654
0.762992	1.06896
0.735021	1.11385
0.731093	1.01083
0.808276	1.06542
0.764739	1.03751
0.812279	1.03901
0.740258	1.03463
0.820687	1.02029
0.817526	1.04427
0.737121	1.0721
0.680913	1.08798
0.768267	1.16849
0.82981	1.08871
0.931838	1.02631
0.944301	1.13486
0.775	1.06337
0.989205	1.11129
0.732697	1.01914
0.73688	1.12392
0.821292	1.0648
0.82251	1.05255
0.645595	1.08439
0.705679	1.03818
0.61631	1.08572
0.854207	1.00655
0.588362	1.07965
0.903842	1.11192
0.894579
0.55734
0.803908
0.72658
0.955554
0.631298
0.819477
0.858546
0.591487
0.891412
0.799461
0.755371
0.917879
0.850948
0.812856
0.843383
0.73923
0.754863
0.831932
0.728234
0.837266
0.926943
0.82887
0.778595
0.856944
0.927473
0.994937
0.885434
0.970436
0.965031
0.985557
0.939444
0.919007
0.869878
0.87501
0.706167
0.855183
0.865575
0.877124
0.91008
0.901443
0.995955
0.867011
0.927295
0.962833
0.870027
0.858684
0.858554
0.92032
0.992708
0.856856
0.838331
0.98207
0.906151
0.878779
0.880991
0.939948
0.806359
0.860055
0.795003
0.873051
0.702707
0.820662
0.836676
0.753652
0.865416
0.733837
0.790833
0.883961
0.795512
0.710344
0.612183
0.898845
1.02845
0.78825
0.769452
1.00238
0.785029
0.73752
1.02121
0.872187
0.831205
0.67266
0.751799
0.83193
0.825799
0.901069
0.909155
0.890191
0.919678
0.632031
0.60023
0.847373
0.80147
0.75478
0.929499
0.693762
0.828134
0.832908
0.834397
0.857724
0.832613
0.86396
0.785699
0.785697
0.779504
0.882721
0.779498
0.821517
0.852093
0.806161
0.864857
0.817316
0.680529
