# Supplementary material for: C. elegans neurons have functional dendritic spines
Source: eLife. 2019 Oct 4;8:e47918. doi: 10.7554/eLife.47918 (PMC6802951; doi:10.7554/eLife.47918)
Supplement: Figure 4—source data 1. [file elife-47918-fig4-data1.xlsx]

## Sheet: Sheet1
EtOH																							ATR
1	1	1	1	1	1	1	1	1	1	1	1	1	1	1	1	1							1	1	1	1	1	1	1	1	1	1	1	1	1	1	1	1	1	1	1	1
0.612788	0.779288	1.0623	0.987676	0.963985	0.81382	0.893145	0.612788	0.73252	0.670647	1.04634	0.61955	0.38704	0.378311	0.793425	0.659765	0.632854							2.01932	1.61717	2.78937	2.39277	1.54443	1.707	1.39365	1.11925	0.971374	0.949464	1.00187	0.78848	0.753721	0.836385	0.566511	0.6309	1.17208	1.00294	0.662468	0.550587
0.483269	0.6168	0.844609	0.901068	0.899858	0.780405	0.809907	0.483269	0.569542	0.515495	0.939884	0.533562	0.226777	0.438646	0.574847	0.563896	0.535375							1.77521	1.30821	2.55181	2.64262	1.44102	1.52383	1.40794	1.15254	0.755712	0.760914	0.853447	0.726503	0.659211	0.775263	0.575181	0.596072	1.05483	0.916656	0.566874	0.49682
0.468152	0.634234	0.904776	0.931171	0.946489	0.811446	0.808631	0.468152	0.533015	0.507188	0.962276	0.527444	0.305538	0.390306	0.542167	0.551923	0.523911							2.09398	1.19568	2.71718	2.75303	1.41468	1.48607	1.47152	1.14594	0.751113	0.769045	0.934736	0.744812	0.618119	0.770624	0.534825	0.595205	1.00944	0.892169	0.492879	0.470583
0.413621	0.641102	0.96196	0.849643	0.932897	0.777315	0.809676	0.413621	0.493269	0.493528	0.942342	0.528043	0.283015	0.26349	0.521913	0.554087	0.517493							2.14039	1.21839	2.74147	2.52347	1.35995	1.55855	1.4222	1.12466	0.782922	0.756753	0.890957	0.779093	0.597611	0.748646	0.570748	0.598019	1.01512	0.879257	0.501296	0.476071
0.450495	0.6656	0.880906	0.862915	1.01151	0.791498	0.805544	0.450495	0.484431	0.535576	0.967026	0.522494	0.323152	0.410713	0.500164	0.548304	0.507099							2.5488	1.22865	2.91995	2.54838	1.41491	1.50643	1.43498	1.1337	0.881366	0.862129	0.900437	0.769598	0.572656	0.755365	0.558355	0.643489	0.9566	0.856996	0.474959	0.452976
0.57827	0.802068	0.94917	0.903983	0.988524	0.861418	0.872456	0.57827	0.56433	0.664247	0.993319	0.676431	0.388638	0.377029	0.65459	0.703886	0.630008							4.81022	1.96914	4.31716	4.20058	1.4354	1.60938	1.79309	1.39153	0.999814	1.0267	1.0326	0.868414	0.74568	0.969188	0.785979	0.915637	0.995713	0.860667	0.477077	0.531191
0.544532	0.661171	1.01401	0.820863	0.828521	0.774647	0.816419	0.544532	0.483833	0.53177	0.973306	0.522269	0.278304	0.364837	0.527888	0.559379	0.508316							3.02357	1.37327	3.52983	3.13585	1.31514	1.22437	1.54564	1.11017	0.764586	0.862225	0.877442	0.71767	0.606805	0.726418	0.627204	0.700181	0.832914	0.699908	0.481257	0.425852
0.451367	0.661873	0.854684	0.841684	0.97126	0.813216	0.759703	0.451367	0.457442	0.466434	0.984247	0.503823	0.212247	0.2465	0.488093	0.570903	0.492616							3.18812	1.50243	3.1593	3.25468	1.18593	1.19583	1.59213	1.12723	0.795819	0.79162	0.819948	0.72161	0.574197	0.712468	0.653608	0.716196	0.759859	0.64614	0.539171	0.411568
0.40161	0.67242	0.837893	0.878405	0.961008	0.75957	0.753961	0.40161	0.464803	0.50745	0.952028	0.502944	0.219383	0.328163	0.449519	0.551541	0.475381							2.89438	1.25745	3.08224	3.29566	1.1549	1.27577	1.51141	1.11606	0.792617	0.711938	0.801336	0.711701	0.555229	0.712016	0.63197	0.675176	0.745605	0.637107	0.568992	0.384955
0.458742	0.67919	0.871218	0.896417	0.879518	0.807834	0.762595	0.458742	0.466883	0.512411	0.942623	0.515334	0.259406	0.305291	0.507889	0.555067	0.487465							2.86748	1.3173	2.8591	2.88213	1.13158	1.2923	1.63495	1.18587	0.822307	0.711728	0.783862	0.737845	0.540084	0.703257	0.404815	0.596375	0.764709	0.633827	0.536719	0.415793
0.586487	0.800556	0.959807	0.917184	0.889639	0.876008	0.840312	0.586487	0.589986	0.690012	1.0004	0.651836	0.397545	0.375058	0.580333	0.734073	0.59702							5.11222	2.38736	4.13931	4.34752	1.21806	1.3848	1.70086	1.22759	0.931813	0.680027	1.09939	0.886609	0.60352	0.963753	0.786282	0.851853	0.806877	0.729238	0.931189	0.666196
0.452867	0.611463	0.886733	0.799184	0.859014	0.771139	0.740927	0.452867	0.47332	0.484409	0.93992	0.524406	0.332344	0.470424	0.466582	0.598429	0.48175							3.25227	1.6518	2.65092	2.90219	1.10991	1.14669	1.58539	1.08093	0.736732	0.501081	0.777629	0.69082	0.496411	0.662656	0.628429	0.6584	0.701798	0.613112	0.744322	0.402427
0.580045	0.661112	0.924036	0.796054	0.875814	0.858092	0.775226	0.580045	0.470931	0.517284	0.920267	0.516438	0.358436	0.397502	0.442637	0.590379	0.484431							3.57169	1.67969	2.94469	2.89895	0.977679	1.1213	1.55887	1.00452	0.775726	0.48481	0.774319	0.675928	0.475738	0.656309	0.62964	0.623334	0.688491	0.591414	0.738803	0.462704
0.545726	0.636507	0.845545	0.782442	0.828786	0.817533	0.758857	0.545726	0.494987	0.538274	0.908565	0.523885	0.322524	0.360072	0.452365	0.60851	0.485958							3.49902	1.78773	3.15155	2.8636	0.959114	1.10559	1.54747	1.03998	0.72194	0.53215	0.829128	0.680011	0.470945	0.620085	0.614175	0.611859	0.683546	0.577971	0.766534	0.484506
0.463546	0.642751	0.846458	0.809022	0.858286	0.771608	0.755319	0.463546	0.511202	0.531433	0.944555	0.512834	0.294947	0.331055	0.436191	0.621872	0.454821							3.869	1.79401	2.7156	3.17657	0.922279	1.00589	1.46366	1.04582	0.723258	0.502535	0.790232	0.655881	0.455521	0.618091	0.55725	0.643292	0.690009	0.602603	0.752738	0.446616
0.58029	0.941951	0.930074	0.896918	0.905348	0.883883	0.817658	0.58029	0.5986	0.629293	0.974873	0.656674	0.4002	0.396779	0.520557	0.686279	0.535265							6.13594	2.55751	3.81369	3.87919	0.809374	1.04661	1.72887	1.17847	0.824045	0.610666	0.897277	0.777859	0.697815	0.778494	0.632121	0.721169	0.806002	0.68562	0.822552	0.545671
0.423673	0.712917	0.795582	0.86592	0.832722	0.806765	0.766005	0.423673	0.572785	0.518591	0.945362	0.516807	0.310991	0.28955	0.45087	0.60614	0.460521							4.01174	1.83698	2.75769	3.14857	0.514826	0.836109	1.62279	1.00541	0.705489	0.445399	0.768086	0.644258	0.550264	0.682655	0.533539	0.502442	0.667538	0.539545	0.63914	0.373604
0.438912	0.653249	0.828438	0.791153	0.81602	0.834016	0.762165	0.438912	0.558878	0.484148	0.919704	0.505626	0.313988	0.27164	0.415726	0.657693	0.46996							3.53834	1.69879	2.95959	2.8108	0.488002	0.745665	1.63074	0.992413	0.683746	0.39449	0.695816	0.626626	0.522578	0.674402	0.646738	0.484193	0.694007	0.547679	0.700008	0.31701
0.483835	0.696761	0.870445	0.775914	0.894798	0.850124	0.757322	0.483835	0.559126	0.509762	0.919496	0.504198	0.345047	0.298488	0.398829	0.655487	0.453484							3.56455	1.69727	2.51008	2.54978	0.410327	0.725198	1.64093	0.988566	0.555661	0.394643	0.678141	0.639731	0.496752	0.657771	0.63887	0.530121	0.643518	0.53802	0.75795	0.31513
0.429809	0.696146	0.791638	0.752929	0.815855	0.824112	0.748231	0.429809	0.553677	0.501806	0.915929	0.481899	0.236198	0.198521	0.39228	0.657031	0.476134							3.73076	1.57774	2.56569	2.58453	0.332945	0.680039	1.60462	1.00385	0.686392	0.355778	0.672096	0.613833	0.478929	0.638918	0.446987	0.494303	0.609888	0.497073	0.820601	0.296652
0.752314	0.782693	0.945871	0.861592	0.836822	0.956312	0.821412	0.752314	0.607001	0.661267	0.966802	0.628458	0.224607	0.121065	0.489188	0.752659	0.544411							4.44787	2.02845	4.08933	3.62973	0.309866	0.70613	1.80223	1.10973	0.761101	0.428927	0.85371	0.742664	0.520965	0.76703	0.966892	0.727108	0.690533	0.579876	0.923023	0.428664
0.818872	0.692341	0.855714	0.795285	0.907299	0.870273	0.732261	0.818872	0.509756	0.519961	0.932557	0.499459	0.217328	0.167795	0.39953	0.590884	0.417278							3.26264	1.56236	2.66729	2.91013	0.243503	0.535931	1.60602	0.901045	0.609945	0.330381	0.628391	0.561312	0.421357	0.551667	0.757683	0.575566	0.594713	0.500776	0.932806	0.385136
0.797283	0.650712	0.821628	0.747903	0.906373	0.822404	0.721607	0.797283	0.491995	0.489681	0.947513	0.515345	0.240508	0.125665	0.409522	0.592042	0.418483							3.31056	1.58045	2.49572	2.48162	0.187764	0.565637	1.55918	0.848313	0.624561	0.358848	0.645054	0.570289	0.41431	0.549892	0.559248	0.538513	0.562312	0.490882	0.857863	0.382475
0.777484	0.661668	0.818282	0.814013	0.83077	0.875682	0.726799	0.777484	0.479362	0.509053	0.911367	0.493012	0.231516	0.163786	0.397976	0.58712	0.39896							3.2733	1.64113	2.21997	2.62213	0.187243	0.536656	1.49659	0.832035	0.555651	0.331376	0.593355	0.551383	0.413237	0.575893	0.68086	0.563796	0.54871	0.485814	0.837017	0.422439
0.664106	0.651463	0.797746	0.749996	0.750174	0.832878	0.730693	0.664106	0.424158	0.486191	0.921272	0.500861	0.136968	0.110023	0.386969	0.566619	0.438986							3.65565	1.50166	2.34842	2.30081	0.213988	0.564467	1.53519	0.872362	0.558726	0.342883	0.604671	0.546001	0.406835	0.565873	0.490944	0.485101	0.534079	0.467877	0.80937	0.408727
0.880747	0.755093	0.873897	0.865151	0.953137	0.977213	0.817766	0.880747	0.644584	0.626183	0.999854	0.602158	0.320154	0.317023	0.594303	0.698622	0.519827							5.1622	1.84223	2.89527	3.3593	0.226998	0.622843	1.53334	0.88232	0.60521	0.367237	0.791906	0.685156	0.495754	0.697741			0.577657	0.56126	0.993562	0.495978
0.750738	0.613532	0.756874	0.721806	0.726395	0.857871	0.73441	0.750738	0.435339	0.494904	0.92537	0.511178	0.273309	0.237627	0.439069	0.542475	0.40625							3.09829	1.52971	2.64186	2.28416	0.13509	0.440018	1.30461	0.772438	0.520298	0.2696	0.555746	0.537997							0.876174	0.388053
0.69662	0.617298	0.764129	0.704259	0.697986	0.869716	0.72974	0.69662	0.409432	0.535356	0.924693	0.487268	0.396032	0.232008	0.396531	0.520402	0.405139							2.86044	1.45856	2.62795	2.32688	0.122589	0.452002	1.28032	0.765864	0.504559	0.29142	0.547364	0.492483							0.875449	0.391751
0.665545	0.617824	0.766025	0.800347	0.80127	0.862715	0.708131	0.665545	0.478223	0.462607	0.924813	0.480957	0.387611	0.253894	0.406429	0.495174	0.398219							2.89575	1.46162	2.51053	2.04633	0.108493	0.34251	1.26541	0.737687	0.450529	0.299101	0.541906	0.507527							0.750704	0.358643
0.598329	0.604332	0.8246	0.708319	0.806925		0.7176	0.598329	0.500186	0.511001	0.909268	0.48021	0.397031	0.326158	0.376128	0.484133	0.392924											0.124931	0.399333	1.25323	0.708514	0.54621	0.286398									0.796605	0.39975
