# Supplementary material for: C. elegans neurons have functional dendritic spines
Source: eLife. 2019 Oct 4;8:e47918. doi: 10.7554/eLife.47918 (PMC6802951; doi:10.7554/eLife.47918)
Supplement: Figure 4—source data 2. [file elife-47918-fig4-data2.xlsx]

## Sheet: mCherry
mCherry	1	1.16924	1.08591	1.13809	1.2973	1.20919	1.28021	1.27786	2.60175	2.30847	1.62355	1.61398	1.78564	1.55754	2.21193	2.1763	1.82507	1.56157	1.39104	1.78428	1.58488	2.1463	2.19119	2.2354	2.15291	2.12753	1.83532	1.79142	1.81656	1.51531	1.66806	1.77167	1.84998	1.77501	1.62985	1.85264	2.06305	1.76195	1.83517	2.26806
	1	1.21659	1.12325	0.978084	1.20441	1.21402	1.20205	1.23009	1.31693	1.33126	1.52672	1.58994	1.49598	1.38147	1.18142	1.58016	1.64496	1.60581	1.42058	1.5979	1.44937	1.16509	1.14222	1.15038	0.95969	1.29845	1.36875	1.5667	1.38935	1.2484	1.32252	1.42062	1.33926	1.35844	1.26166	1.41565	1.48529	1.65581	1.53248	1.59611
	1	0.819807	1.09559	1.21343	1.10204	1.06323	0.933665	1.01812	0.938737	0.889737	0.879789	0.821925	0.829656	0.875751	0.853295	0.914311	0.918546	0.895696	0.854476	0.858071	0.810302	0.886437	0.803703	0.656899
	1	1.02615	1.0831	1.15357	1.23188	1.31932	1.17211	1.1289	1.1123	1.13275	0.990026	1.09011	1.11798	0.990292	1.04534	0.968974	1.12125	1.09818	1.12807	1.07511	0.994442	1.02063	1.05787	0.860515
	1	0.831917	0.85043	0.746825	0.65636	0.983538	0.93303	0.896297	0.910463	0.961997	0.894881	0.840025	0.883353	0.796112	0.799971	0.877296	0.770662	0.859564	0.85424	0.818435	0.883548	0.830354	0.85468	0.81018
	1	1.07716	0.977771	1.05	1.45426	1.31991	1.07186	1.10865	1.15828	0.99732	1.181	1.03977	0.858344	0.908648	0.858283	1.06425	1.0215	0.940926	1.02351	0.992144	0.905116	0.955847	1.00359	0.97296	1.21547	1.27302	1.3232	1.12972	1.12467	1.09062	0.963337	1.10999	1.07875	1.08429	1.10518	1.20018	1.07948	1.05968	0.877893	0.979294
	1	1.02959	0.885988	1.01718	1.18917	1.28761	1.12804	0.934304	1.00973	0.948933	1.00906	0.79137	0.957858	0.954973	0.837002	0.943028	0.822977	0.836129	0.858073	0.876996	0.901825	0.926117	1.0761	0.874044	0.957657	0.902765	0.852637	0.964971	1.02711	0.939069	0.799758	0.94182	0.939471	0.951215	0.838344	0.967588	0.853107	0.985908	0.797477	0.830493
	1	0.803768	0.963797	1.00228	0.935332	0.888808	0.889454	0.985155	0.883485	0.925962	1.01306	0.942661	0.819106	0.94346	0.875476	0.897973	0.898194	0.808818	0.932577	0.898636	0.866209	0.88959	0.855598	0.876666	0.748538	0.951078	1.2399
	1	0.975107	0.943201	1.02975	1.00304	0.97779	1.03932	1.02249	0.993456	1.00031	0.962182	0.978739	0.92216	0.954229	1.00473	1.0598	1.01205	0.891336	1.01114	0.948059	0.995554	0.92055	0.923041	0.999693	0.921873	0.942856	0.943661
	1	0.919342	0.880438	0.989851	0.994729	0.894226	0.809142	0.87088	0.973291	0.936236	0.962375	0.935745	0.941724	0.906931	0.814826	0.88742	0.855165	0.915211	1.00045	1.18264	0.891905	0.843207	0.769511	0.803851	0.766718	0.738514	0.777633
	1	1.01355	0.999491	1.16584	1.18833	1.19597	1.08533	1.33157	1.25383	1.09399	1.11717	1.22322	1.23619	1.27856	1.09114	1.08417	1.03895	1.11772	1.03781	1.0668	1.19187	1.2156	0.983212	1.11807	0.981499	1.0421	0.892836
	1	0.937993	0.867924	0.806449	1.03614	1.06148	0.89379	1.06422	0.97192	0.995482	1.06927	1.08761	1.00071	1.01497	0.971654	0.872354	0.906458	0.997343	0.896093	0.925591	1.0248	1.0155	1.03437	1.06024	1.09859	1.01913	0.943839	1.09115	0.982904	1.11409	0.932501	1.06856	1.08327	1.00292	1.09886	0.993002	0.931881	1.10054	1.05722	0.886792
	1	0.864245	0.85016	0.941297	0.9515	0.924547	0.987209	1.0788	1.15662	0.978681	0.844678	0.788107	0.774707	0.927593	0.867976	0.880615	0.651744	0.748744	0.86691	0.803335	0.653875	0.84384	0.995736	0.868357	0.910157	0.873001	0.952566	0.94518	1.07355	1.01941	1.01439	1.00198	1.00959	1.01873	0.976778	0.985229	0.986295	0.983021	1.07941	0.847267
	1	0.865554	0.837135	1.04435	0.894992	0.93437	1.04562	1.01427	0.862368	0.887218	0.817	0.813687	0.801071	0.802855	0.771505	0.712247	0.585701	0.848477	0.746145	0.674525	0.761183	0.540206	0.886581	0.754938	0.850006	0.886071	0.773671	0.772907	0.80158	0.753536	0.800306	0.82643	0.695298	0.62457	0.848095	0.719001	0.607876	0.750223	0.599465	0.528355
	1	0.934134	0.9543	0.931168	0.904469	0.913706	0.807773	0.882125	0.845287	0.834885	0.825235	0.864138	0.888997	0.804957	0.827788	0.82148	0.832482	0.858656	0.858205	0.890875	0.971874	0.95445	0.955914	0.902478	0.941344	0.967706	0.962523	0.97807	1.0344	1.02715	1.02313	0.92546	0.960008	0.984454	0.89632	0.926662	0.956327	0.993429	0.986594	0.956027
	1	1.0035	0.918102	0.843899	0.872702	0.897695	0.842617	0.86178	0.838652	0.827574	0.863256	0.791969	0.770669	0.764683	0.786955	0.824814	0.793563	0.733354	0.760524	0.727524	0.750923	0.747775	0.815447	0.799044	0.820655	0.778598	0.735142	0.820461	0.881797	0.836631	0.812998	0.849769	0.796129	0.874568	0.930734	0.842345	0.927469	0.906791	0.857698	0.768531
	1	0.977537	0.942873	0.951007	0.911174	0.929723	0.932155	0.941771	0.894489	0.908932	0.914519	0.91946	1.02486	0.889776	0.920677	0.922691	0.932459	0.876967	0.89141	0.90973	0.932991	0.92881	0.891144	0.935462	0.884949	0.915545	0.90133	0.876511	0.918662	0.922463	0.863512	0.853288	0.902623	0.814671	0.995781	0.852224	0.819536	0.871798	0.889206	0.895173
	1	1.00103	0.951013	1.0002	1.03264	0.902809	0.998532	1.05731	1.0208	1.04864	1.10972	1.01541	0.951551	1.07243	1.08055	1.08696	1.05398	1.02178	0.948175	0.965743	0.970344	0.975923	0.904815	0.91749	0.94793	0.930117	0.893217	0.998336	0.940736	0.997113	0.942351	0.967358	0.854899	0.974259	0.91338	0.831898	0.770187	0.848684	0.925761	0.879172
	1	0.972397	0.893191	0.878313	0.891899	0.863827	0.864766	0.925531	0.86461	0.856035	0.861673	0.837986	0.891429	0.858345	0.877687	0.864806	0.851337	0.831095	0.855957	0.85075	0.790494	0.756352	0.827219	0.766141	0.808621	0.737559	0.766963	0.782311	0.812145	0.795858	0.812889	0.786226	0.866763	0.918367
	1	0.966091	0.859908	0.873246	0.855134	0.885889	0.846483	0.842751	0.854584	0.847641	0.895495	0.862049	0.903307	0.936348	0.824234	0.837051	0.832306	0.802766	0.838498	0.798571	0.844487	0.856725	0.886497	0.910193	0.886208	0.898678	0.84142	0.838179	0.834071	0.778057	0.785204	0.767005	0.757284	0.824639
	1	1.04705	0.834562	0.840166	0.909656	0.847091	0.871197	0.853197	0.818016	0.781249	0.791875	0.735707	0.823091	0.795205	0.818333	0.876906	0.977665	1.00188	1.05569	1.07599	1.00492	0.914413	0.904977	0.942484	0.870404	0.873153	0.932334	0.912933	0.882695	0.990881	0.993075	0.971083	0.917215	1.00624
	1	1.0808	1.16469	1.14078	1.15353	1.09746	1.19519	1.05278	0.875699	0.894169	0.961851	1.14068	1.05768	1.08918	1.1126	1.17412	0.932983	0.985702	1.02908	1.15541	1.11798	1.19286	1.17805	1.30483	1.15272	1.26341	1.11916	1.02817	0.976512	1.12878	0.824945
	1	0.952733	0.909647	0.87778	0.876966	0.835363	0.893252	0.98822	0.847904	0.920287	1.11867	1.06211	0.996001	0.947232	1.15278	1.15859	1.07106	1.06733	0.982375	0.974376	0.920179	0.980529	0.927689	0.994426	1.16579	1.09879	1.10065	1.17231	1.07841	1.12249	1.14875
	1	1.10695	1.25596	1.5132	1.6209	1.45488	1.51616	1.20873	0.933152	0.957697	1.15586	1.37214	0.67922	0.957523	1.40892	1.53398	1.62729	1.54982	1.54192	1.45448	1.36807	1.32327	1.45128	2.23478	1.83479	1.74723	1.57489	1.50589	1.41571	1.36918	1.0994
	1	0.979101	0.990747	1.06394	1.04375	0.983032	0.962134	0.946045	0.875	0.922095	0.905225	0.926025	0.925098	1.03845	0.944629	0.916113	0.847754	1.19944	1.31977	1.14788	1.24509	1.24871	1.17954	1.19595	1.16941	1.22195	1.19265	1.16724	1.10178	1.13972	1.0866	0.944409	0.872681	0.845972
	1	1.17572	1.03241	1.21982	1.16836	1.13436	1.23752	1.17875	1.09104	1.20459	1.17413	1.25055	1.14077	1.25708	1.06463	1.0613	1.10288	1.1536	1.23676	1.11482	1.27533	1.20301	1.16296	1.30223	1.25825	1.13769	1.23398	1.25777	1.19783	1.28221	1.40525	1.21122	1.05187	1.07709
	1	0.952961	0.964582	0.900643	0.884764	0.824196	0.823353	0.882324	0.863717	0.845442	0.858838	0.863983	0.812708	0.775937	0.693457	0.790486	0.745975	0.481348	0.309182	0.60927	0.675072	0.504768	0.601175	0.595498	0.630406	0.421158	0.440098	0.58676	0.560523	0.666689	0.80754	0.886649	0.940741	0.876048
	1	1.0357	1.08681	1.0828	1.05019	1.02683	1.06032	1.05986	1.0434	1.04243	1.02727	1.08683	1.07067	1.07482	1.06253	1.06247	1.04502	1.04033	0.994927	0.974592	1.02406	0.941545	0.941966	1.00517	0.95851	0.976979	1.01799	0.996872	1.03928	1.06038	1.06	1.04967	1.09036	1.03584	1.05158	1.02493	1.02493	1.01171	1.05244	1.04233
	1	1.04021	1.07671	1.07757	1.00675	0.986472	1.04007	0.987252	0.962704	0.951239	0.998996	0.971345	0.918941	0.939308	0.885158	0.870905	0.86966	0.846468	0.842529	0.82664	0.869771	0.902774	1.04828	0.994035	0.970044	1.00316	1.0231	0.912029	0.887351	0.894728	0.908944	0.888354	0.848717	0.786817	0.779459	0.740267	0.77957	0.784123	0.728411	0.73302
	1	0.972321	0.941567	0.992589	0.976693	1.03098	1.02483	0.996517	1.01838	0.996962	1.03842	1.11605	1.09612	1.12024	1.06803	1.10616	1.06714	1.04046	1.08804	1.09641	1.11805	1.08018	1.04069	1.03087	0.935119	0.977027	0.902401	0.917741	0.96165	1.00467	0.958241	0.930525	1.04661	1.09956	1.01871	1.00537	1.06566	1.1059	1.05588	0.948755
	1	1.00445	1.04814	1.07043	0.996475	1.00686	1.01222	1.01459	0.982932	0.989773	0.997472	1.00793	0.956216	0.987895	0.945757	0.990538	1.00633	0.985112	1.0038	1.00923	0.979453	0.974583	0.946546	0.985483	0.962269	0.97834	0.987129	1.01674	0.983372	1.04705	1.04592	1.0362	1.05197	0.983303	1.01925	0.945827	0.975673	1.04274	0.963382	0.984903

## Sheet: GCamp6
1	1.15216	1.56716	1.20884	0.749219	0.613119	1.60375	1.12628	7.66667	7.90674	3.39268	3.04105	3.2954	5.74743	12.0553	9.89692	4.77733	3.25569	1.83222	1.90004	2.08746	6.58054	15.378	17.788	13.9197	8.64302	4.12762	3.09951	2.91209	2.09639	2.04061	1.79161	1.96073	2.10486	1.96296	1.73762	1.61847	2.03391	1.97189	1.63855
1	1.30801	1.11896	1.51207	2.06095	1.36955	1.25736	1.48292	4.70377	5.73793	3.6755	2.62426	2.91313	4.26207	7.38958	6.92197	3.97674	2.8189	2.07391	1.6222	1.65783	4.94935	7.73616	9.87839	8.47173	6.47114	3.57833	2.3669	1.90901	1.72173	1.64134	1.65872	1.70377	1.7179	1.52591	1.74529	1.74529	1.90106	1.30948	1.59806
1	1.01108	3.776	8.29662	6.152	3.57508	2.272	1.80246	1.25077	1.16277	1.28031	1.29939	1.13785	1.21292	1.17354	1.43877	1.51323	1.02554	1.01908	1.04831	0.992615	0.906769	0.609538	0.706461
1	1.11229	3.14322	7.68847	5.64791	3.65678	2.54347	2.31305	1.46692	1.25703	1.50672	1.70799	1.65577	1.65982	1.20456	1.58403	1.41952	1.38682	1.44132	1.25044	1.22104	1.17338	1.01952	1.00076
1	0.931418	2.05917	4.93649	2.73605	1.88022	1.21951	1.2753	0.976093	0.803188	0.746921	1.06013	0.964743	1.03791	0.704902	1.02294	0.917653	0.9773	0.676648	0.745955	0.887225	0.910408	0.695726	0.616518
1	0.768497	0.754686	0.863203	8.06084	4.85432	2.26866	1.72904	2.1562	1.53502	2.80335	2.40217	1.91582	1.12792	1.10556	1.06248	0.975008	0.820454	0.928313	0.88951	0.962183	0.845774	0.866162	1.37784	3.49589	7.94344	5.60375	3.43078	2.61427	1.83821	1.45577	1.7412	1.31536	1.23874	1.17527	0.999671	1.30944	1.13252	1.01677	1.00395
1	1.02247	1.06347	1.01397	5.8928	3.84482	2.51169	1.70574	1.5785	1.51807	2.26966	2.26389	1.59824	1.06408	1.0164	1.12299	0.99423	0.92317	0.637109	0.920437	0.646219	0.591254	0.600668	1.67294	3.63559	4.7106	3.43	2.73702	1.63225	1.3386	0.989371	1.08169	0.97024	1.18281	0.826298	1.13088	1.12268	1.01367	1.20134	1.00486
1	0.569419	0.478274	0.324758	0.355055	0.271351	0.362216	0.230871	0.403357	0.350331	0.358382	0.41189	0.454834	0.50885	0.499708	0.467557	0.531554	0.584605	0.525535	0.628006	0.727379	0.717881	0.667166	0.650735	0.920512	0.809076	0.934378
1	0.736564	0.57476	0.504641	0.374127	0.366317	0.439748	0.377872	0.365118	0.465527	0.464724	0.477193	0.557224	0.609993	0.592778	0.622128	0.730199	0.607249	0.662131	0.748773	0.842719	0.929337	0.82527	0.955214	1.09067	1.03765	0.804113
1	0.980332	1.0381	1.01868	1.0428	1.08039	1.03343	0.962284	0.95094	0.987449	1.01843	1.22804	1.05252	0.989387	0.927396	0.987322	0.954213	1.04601	1.23901	1.11795	0.933655	1.00388	0.827497	0.890728	0.848818	0.918022	0.85441
1	1.06648	1.10528	1.15335	1.30642	1.11317	1.24239	1.28058	1.38003	1.27425	1.33882	1.24639	1.30063	1.17526	1.21532	1.07715	1.18117	1.18845	1.19344	1.03045	1.0178	1.01548	1.0194	0.965199	0.977549	0.864646	0.716714
1	1.0407	1.3183	1.42428	1.52292	1.6388	1.38724	1.54455	1.2092	1.26073	1.40814	1.80748	1.8711	1.80491	1.73286	1.57792	1.58379	1.18354	1.4626	1.44646	1.41419	1.31922	1.23212	1.08196	1.03997	0.887789	0.893656	0.776861	0.679135	0.689036	0.734323	0.715622	0.496883	0.538687	0.59681	0.53612	0.550605	0.609461	0.5	0.551705
1	1.29533	1.4853	1.4565	1.61136	1.7175	1.67232	1.55218	1.39732	1.43283	1.19984	1.55849	1.61432	1.58374	1.89327	1.85737	1.53817	1.25804	1.38153	1.21286	1.19156	1.59104	1.2896	1.11935	0.960347	1.0507	1.09903	0.889327	0.691458	0.670744	0.767607	0.7536	0.763267	0.528704	0.627934	0.764845	0.621227	0.679818	0.686526	0.668968
1	0.820292	1.18888	1.49183	1.71768	1.34709	1.47463	1.4262	1.41301	1.34021	1.73115	1.57667	1.73947	1.64402	1.28518	1.41502	1.59473	1.31958	1.1542	1.15965	1.16251	1.06048	1.02952	1.06162	0.654915	0.819719	0.573803	0.491545	0.768128	0.53683	0.495844	0.570364	0.568071	0.451419	0.390656	0.521353	0.506162	0.443967	0.379192	0.561479
1	1.42695	1.51132	1.73182	1.72766	1.74919	1.76075	1.63402	1.50031	1.34902	1.2169	1.19863	1.21386	1.18866	1.24984	1.2839	1.25919	1.26279	1.32141	1.22306	1.25988	1.30348	1.40058	1.28092	1.21773	1.17953	1.31462	1.24251	1.22867	1.31476	1.36611	1.27559	1.24535	1.283
1	1.204	1.29355	1.54057	1.54839	1.58451	1.53775	1.36178	1.33167	1.29933	1.2812	1.22375	1.28726	1.20252	1.06846	1.08424	1.081	1.15126	1.10968	1.11703	1.09922	1.24419	1.33019	1.20284	1.18355	1.28143	1.21737	1.22333	1.16301	1.08373	1.16403	1.04394	0.988297	0.977056
1	1.25495	1.24729	1.47545	1.46793	1.66059	1.66259	1.46892	1.3987	1.24602	1.27594	1.18206	1.11016	1.11311	1.08781	1.07929	1.27186	1.33048	1.38991	1.41752	1.35015	1.25418	1.3249	1.24997	1.17403	1.23038	1.22299	1.21968	1.17181	1.31207	1.30985	1.25727	1.05408	1.19153
1	0.880095	0.945855	0.854696	0.944871	0.957669	1.04962	0.99114	1.11341	1.30794	1.56231	1.56192	1.67631	2.21205	2.32506	2.85489	2.34653	2.50758	2.64147	2.04902	1.26167	1.08309	0.845639	0.913369	0.743257	0.840323	0.826738	0.747785	0.697381	0.653869	0.710573	0.758614	0.77023	0.741484	0.781256	0.783225	0.7468	0.778697	0.773774	0.801536
1	1.01758	1.07702	1.13233	0.990437	1.07521	1.02481	1.04187	1.00259	1.01938	1.07754	0.999742	0.906694	1.0504	1.0093	0.937193	0.998708	1.07444	0.931507	0.859137	0.872318	0.790644	0.960196	0.887568	0.812096	0.901266	0.913414	0.870251	0.83329	0.866891	0.858103	0.843887	0.833549	0.726027	0.727837	0.678987	0.682605	0.728095	0.676919	0.646162
1	1.11591	1.12546	1.07182	1.05455	1.07409	1.13091	0.963636	1.31727	1.05909	1.28045	1.19727	1.24545	1.31818	1.355	1.58045	1.40818	1.54	1.20409	1.21227	1.20046	1.21409	1.02136	1.16682	0.94	1.15136	0.97	0.994545	0.930909	1.15046	1.06773	1.16364	1.13227	1.27954	1.09773	0.915455	1.31727	1.13727	1.07727	0.905909
1	0.911894	1.03436	1.04875	0.953598	0.93069	1.03612	0.896035	0.920999	0.950955	0.99442	1.01703	1.09163	1.23818	1.22761	1.27342	1.3627	1.41057	1.40822	1.28957	1.12247	1.0141	0.977386	0.913656	0.946549	1.09192	0.902203	0.91953	0.957122	0.920411	0.951542	0.994126	1.00822	0.920705	0.946843	0.891336	0.848458	0.942438	0.89721	0.909838
1	1.0366	1.36086	1.58288	1.4265	1.43618	1.21355	1.81186	1.18754	1.33243	1.14912	1.28584	1.08137	1.57865	1.80913	2.16515	2.21597	3.27253	5.10557	4.37749	5.35632	5.19298	4.83969	4.70266	4.00666	4.76104	4.76951	4.37901	4.65275	4.87598	4.09135	3.69813	3.16122	2.44102
1	1.11245	1.01221	1.42198	1.47366	1.42894	1.57149	1.32074	1.43135	1.46131	1.33182	1.40593	1.4491	1.51768	1.4207	1.93014	2.07653	2.32699	4.95442	4.78305	5.10407	4.37995	4.30797	3.52364	3.29874	3.44115	3.95783	4.17663	3.97174	3.84779	3.69757	3.22363	3.0575	3.02215
1	1.19298	0.952731	0.939526	1.02281	1.17422	0.990996	0.894358	0.986645	0.916417	1.01126	0.970438	0.966987	0.929922	1.2587	1.67782	1.95168	1.53856	1.73469	2.76335	2.86465	2.27731	2.36795	2.16326	2.06318	1.34244	1.41597	2.3762	2.22269	2.43217	2.59394	2.46113	2.60849	2.19028
1	1.34042	1.38897	1.71261	2.07175	3.01462	3.07487	3.03042	3.23377	2.75414	2.69156	2.56853	2.70852	2.38409	3.41646	3.94053	3.07545	3.50283	3.57048	3.39423	3.51024	3.2907	2.82433	2.39189	2.5738	2.36947	2.628	2.53363	2.49522	2.46266	2.36771
1	1.2501	1.53036	1.92136	2.14949	3.43492	3.68178	3.3996	2.99494	2.96275	3.2581	2.64534	2.5087	2.22966	3.05202	3.43947	3.39929	3.71893	3.27986	3.23117	2.49585	2.46002	2.17702	2.16083	2.283	2.36883	2.3417	2.44089	2.38421	2.60688	2.58188
1	0.98584	1.56946	2.00536	2.29736	2.94872	3.13739	2.95714	1.95867	2.51856	2.33027	2.39227	1.13165	1.58974	3.21738	4.18791	4.59127	4.61883	4.55262	4.34252	3.91083	3.3915	4.03751	3.85075	3.36663	3.32874	3.53425	3.63643	3.47838	3.43513	2.42136
