# Supplementary material for: C. elegans neurons have functional dendritic spines
Source: eLife. 2019 Oct 4;8:e47918. doi: 10.7554/eLife.47918 (PMC6802951; doi:10.7554/eLife.47918)
Supplement: Figure 5—source data 1. [file elife-47918-fig5-data1.xlsx]

## Sheet: WT
L3	eL4	L4	YA
2.24913	1.03765	3.81283	4.34493
3.25926	2.97398	3.35533	3.51158
2.18978	2.95139	2.17261	4.52261
2.51106	2.65978	4.06977	2.29008
3.38705	3.92157	3.39506	4.4164
2.32919	2.18579	4.4898	6.20155
1.23153	2.13816	4.5977	4.18719
2.04778	3.63791	4.41501	4.66667
1.51639	2.58283	2.82353	3.66492
2.68312	1.78168	3.95387	6.48298
2.87793	1.70933	3.47072	5.44218
1.38997	3.76534	4.73934	3.35366
2.40627	3.08842	2.86145	3.53774
1.28969	2.28599	1.79977	3.82609
1.08537		2.40062	5.34759
2.89687	3.65403	2.07349	4.01235
	3.891	3.1275
1.88362	3.93496		3.30932
3.01278	3.15104	3.76989	2.77186
3.56332	4.14993	3.19738	2.72076
1.71111	3.4146	2.36435	4.71712
1.8056	3.20364	4.08359	3.18784
2.97613	3.13527	2.56221	4.46803
2.402	2.48179	4.55195	3.40378
0.920245	1.88351	4.53353	1.75975
5.27607	1.67549	2.85817	3.80792
4.43306	2.56209	2.40508	2.38923
2.82529	3.58466	2.23346	2.9882
3.32314	2.87862	2.83007	3.02463
3.00814	3.81939	3.64277	4.15319
	3.70626	2.27073	5.36215
	3.99437	3.55403	4.82374
	3.65684	3.31854	4.01235
	2.28024	2.76566
	2.56755	2.68165	3.10128
	1.26998	3.79658	2.9168
	2.19154	2.84359	2.62186
	3.452	3.38469	3.10803
	2.78572	4.19704	2.63137
	2.53237	2.30975	2.07346
	4.94216	2.81152	4.00101
	3.81883	4.91572	3.88094
	3.40909	3.19965	2.17136
	2.83946	3.58948	2.7962
	2.72702	4.63413	2.07486
	4.22904	5.31789	2.45626
	2.85504	3.39827	2.02195
	5.76879	2.04883	2.97177
		3.76521	2.48834
			1.99957
			2.10448
			1.62691
			2.68197
			4.82711
			2.50698
			2.15404
			3.34517

## Sheet: unc-17
L3	eL4	L4	YA
1.84058	3.09089	3.80423	2.13009
4.91053	2.89908	1.23288	4.39628
2.69411	3.09689	0.565739	2.48139
1.75685	2.3859	2.9504	1.79775
2.83326	2.6932	1.4599	3.81505
2.52384	2.36236	1.9103	2.97539
3.3454	2.17918	2.76903	1.46654
3.9099	2.57284	2.5432	4.62915
1.71406	3.47658	3.37755	3.25072
1.5587	4.31586	3.09176	2.5535
4.50011	2.58433	2.59411	2.48095
4.07306	3.3347	2.80562	3.49144
2.49756	2.69034	2.86463	1.8594
3.24272	2.90265	3.30465	0.372685
2.2882	1.11251	2.2246	2.5025
	1.00314	2.34797	3.08287
	1.24657	2.10485	3.23041
	4.36616	2.31354	2.66945
	3.16246	1.01271	3.06052
	3.19144	2.58512	3.53646
	3.37788	0.924947	2.94191
	2.72659		3.78853

## Sheet: ace-1;ace-2
L3	eL4	L4	YA
3.73639	6.29666	1.63469	1.69361
2.49385	4.41586	1.99606	1.8041
5.94568	3.20281	2.36505	4.70295
4.19716	3.96646	5.67716	2.21551
1.92842	4.43177	4.30913	3.78656
3.20885	4.05186	2.87669	2.47273
4.455	3.13219	3.1587	4.17342
2.85353	3.66688	4.94234	2.60087
4.35737	5.03176	3.12853	4.57335
5.62256	4.35303	1.59608	4.78154
3.07814	6.29666	2.55505	5.34752
4.05433	4.41586	4.34569	3.41323
	3.20281	2.79137	4.52148
	3.96646	1.51743	3.46584
	4.43177	2.04216	2.82346
	4.05186	3.72641	2.15846
	3.13219	2.88224	3.93183
	3.66688	4.54939	4.31554
	5.03176	3.59269
	4.35303	3.56549
	4.11933
	4.22312
	3.37036
	3.83142
	3.5

## Sheet: unc-31
L3	eL4	L4	YA
2.41923	2.60114	1.9985	0.788529
3.3483	2.37732	1.17848	2.26537
4.33258	2.06154	2.25154	1.95866
1.78073	3.27996	2.41118	2.08071
1.33269	2.83428	2.26557	1.57682
2.23892	2.77814	1.55662	2.13028
2.58227	1.94944	4.10341	2.00196
2.14546	1.04117	2.35125	0.386259
2.83226	1.39796	2.7126	0.992359
1.75778	3.17557	3.8155	3.17951
1.21286	3.01066	3.37887	1.66545
2.09284	1.42791	2.24292	2.26591
2.2719	1.12528	3.55946	2.66214
2.02231	1.01217	3.21867	2.04873
3.04878	1.34373		1.96833
1.84916	1.78928		2.60803
0.71663	2.28997		1.38987
2.39636	2.79042		2.817
1.77439	4.23857		3.32613
1.03099	4.45097		2.52828
1.1335	4.55229		2.19321
3.49546			1.25602
4.05743			1.56301
3.48159			1.03477
0.00251742			0.608698
1.24811

## Sheet: VD_L4
VD
4.55975
2.04778
2.19178
3.52349
2.43902
1.1194
5.90452
4.63917
3.31126
0.639744
3.14743
4.90783
3.58976
2.38974
2.44352
3.0499
1.21915
