# Supplementary figures and images for: C. elegans neurons have functional dendritic spines
Source: eLife journal article supplement (doi:10.7554/elife.47918), 2019-10-04

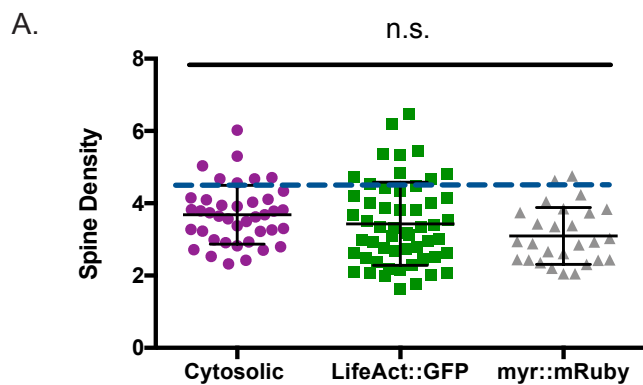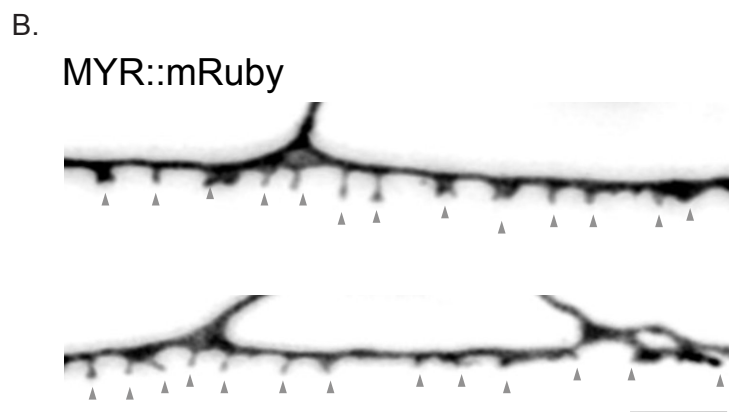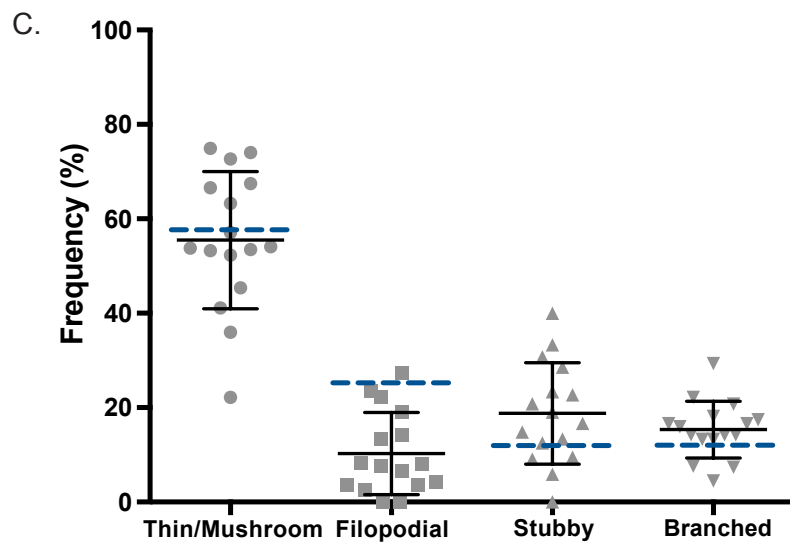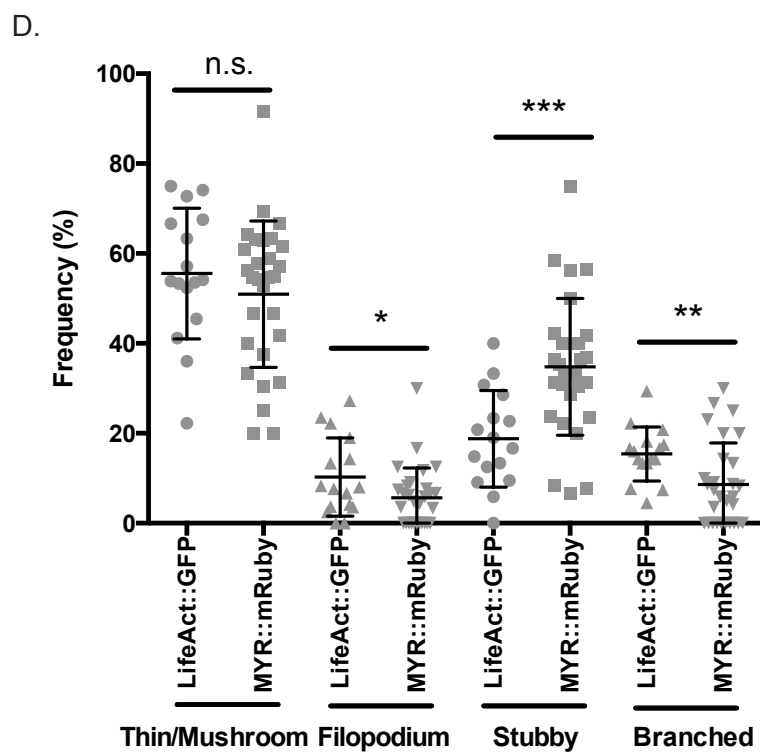

Supplement: supp [file elife_poa_e47918_Figure_1_figure_supplement_1.pdf › elife_poa_e47918_Figure_1_figure_supplement_1.pdf]

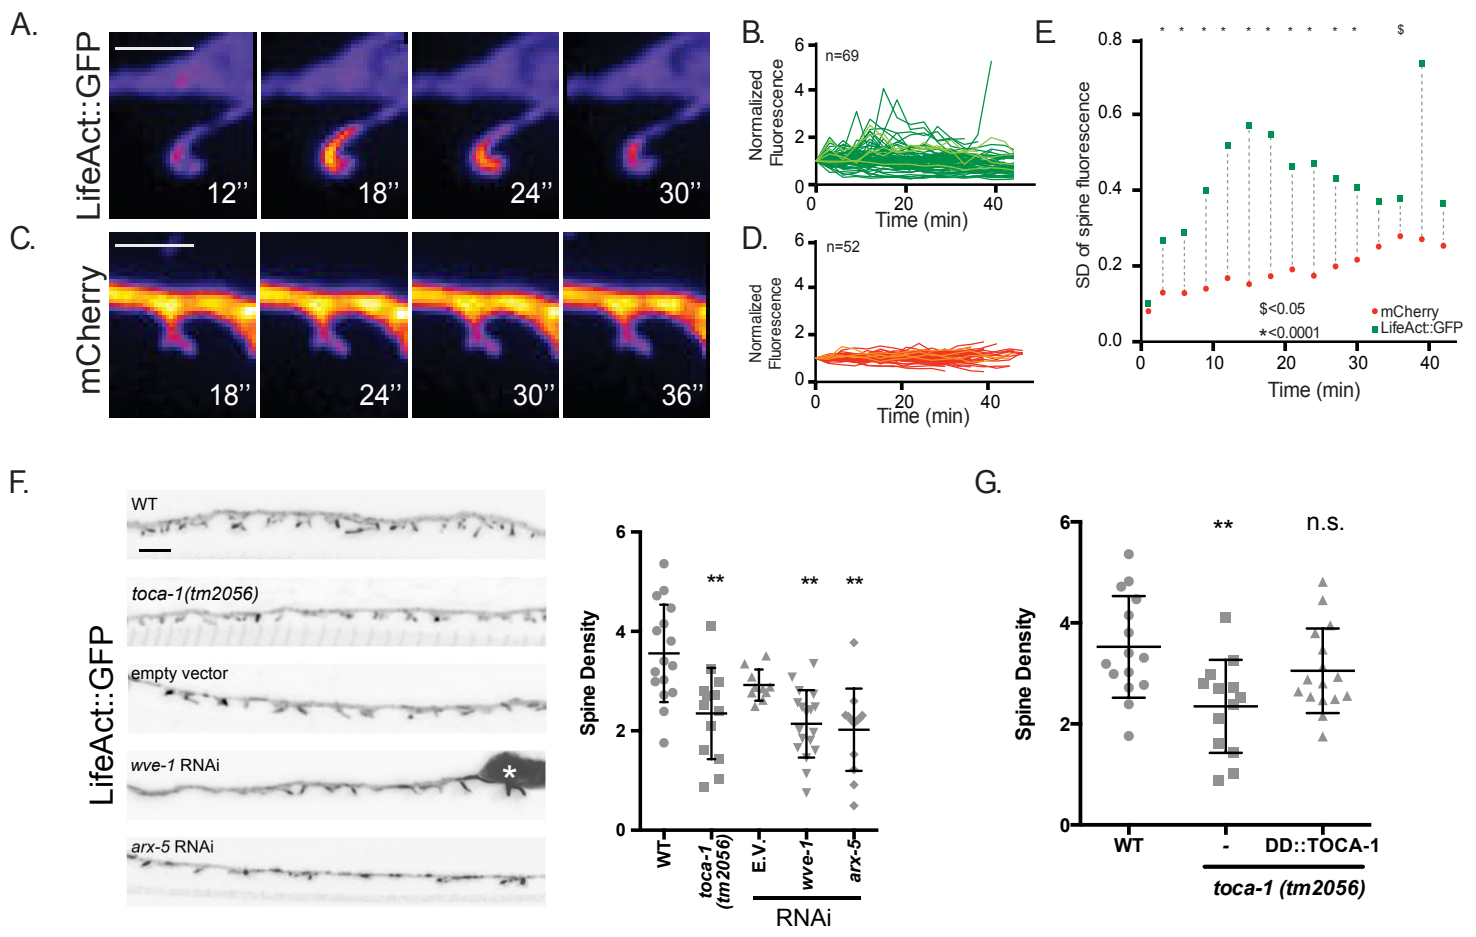

Supplement: supp [file elife_poa_e47918_Figure_1_figure_supplement_2.pdf › elife_poa_e47918_Figure_1_figure_supplement_2.pdf]

A.

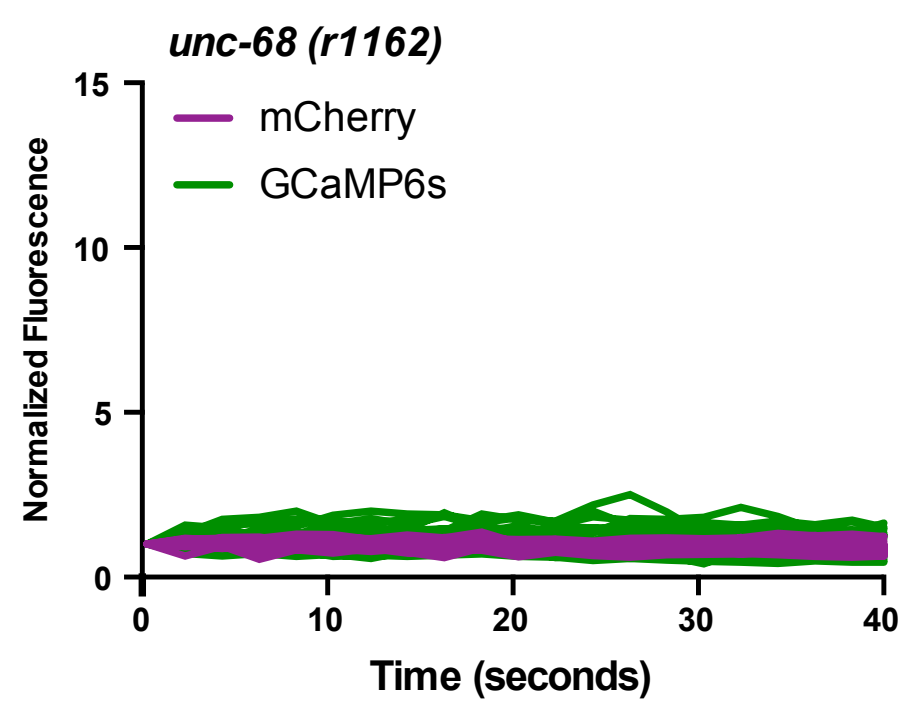

B.

Control

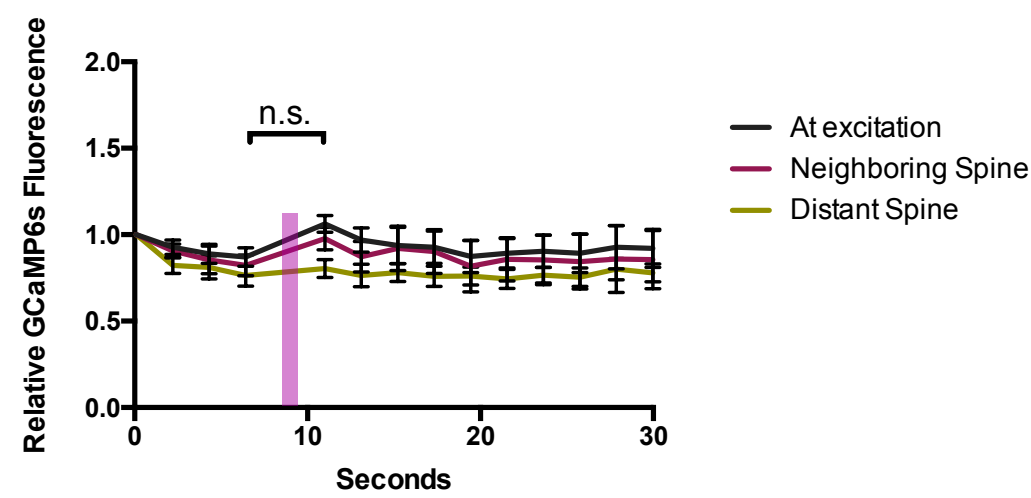

C. Ryanodine

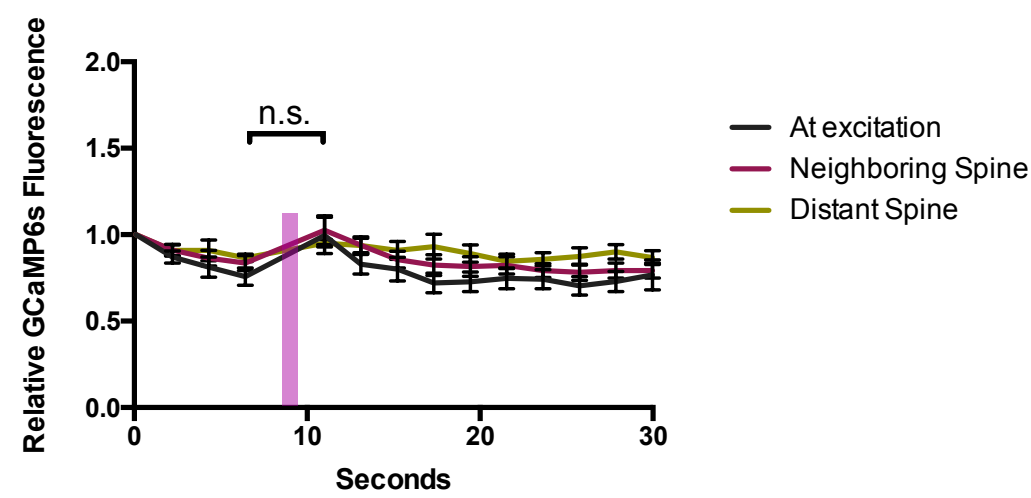

Supplement: supp [file elife_poa_e47918_Figure_4_figure_supplement_1.pdf › elife_poa_e47918_Figure_4_figure_supplement_1.pdf]

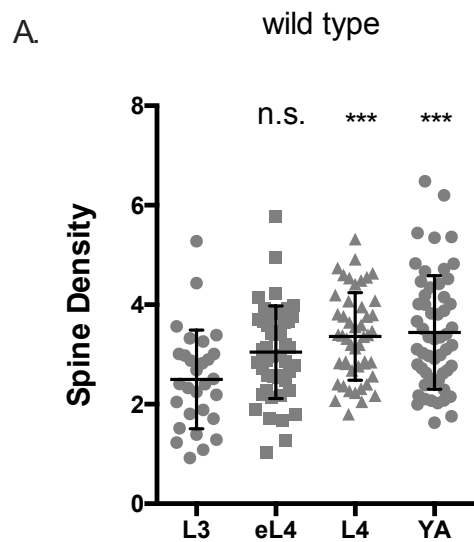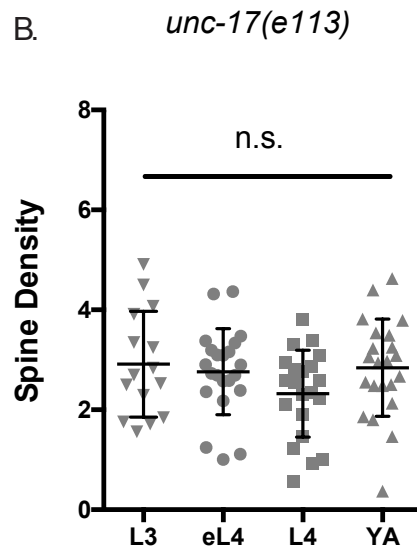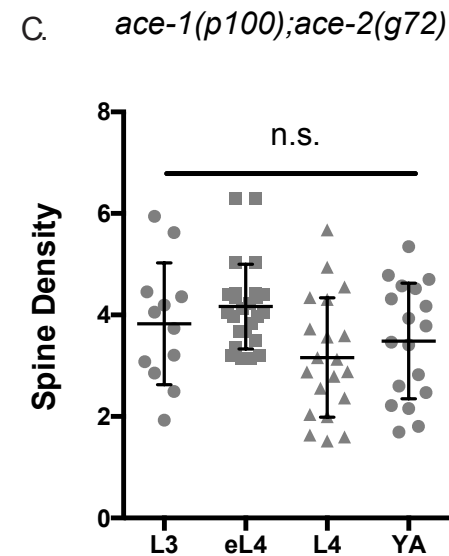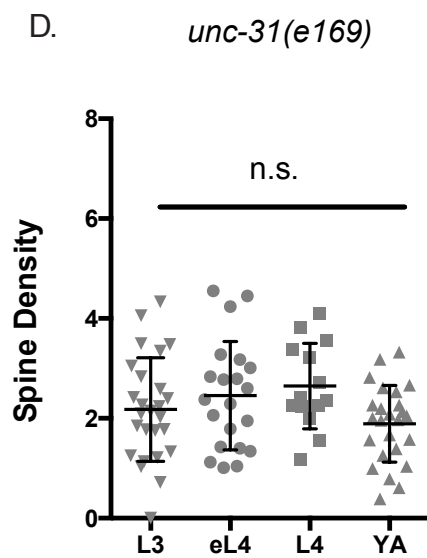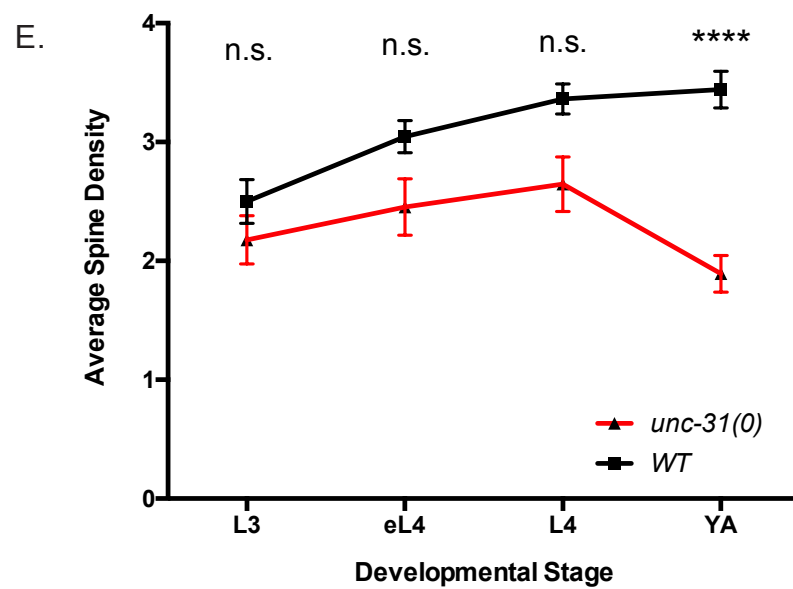

Supplement: supp [file elife_poa_e47918_Figure_5_figure_supplement_1.pdf › elife_poa_e47918_Figure_5_figure_supplement_1.pdf]

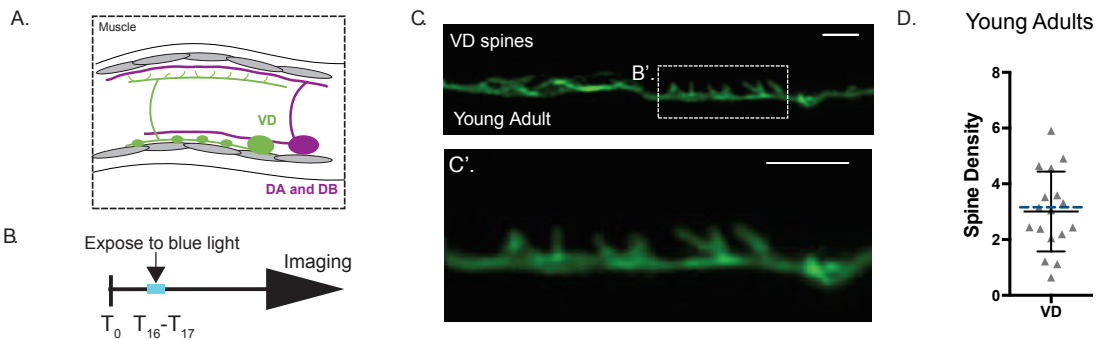

**E. Mitochondria in VD neurons**

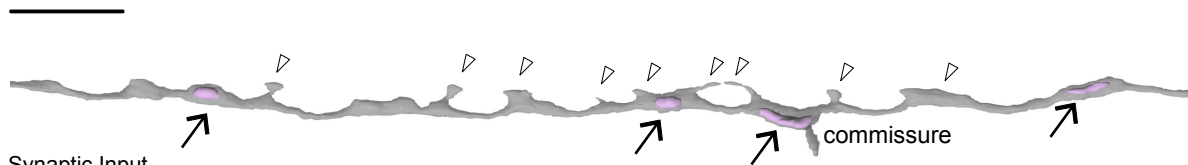

**F. Synaptic Input**

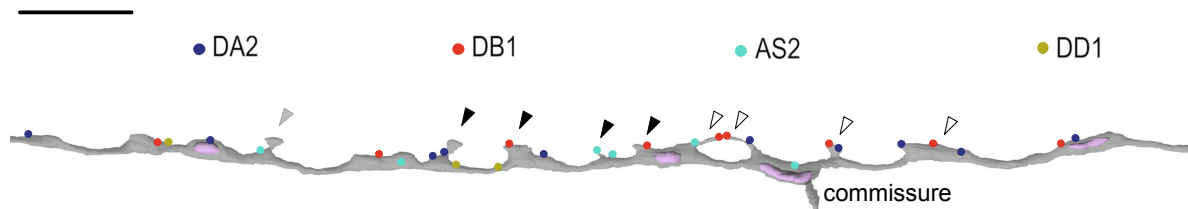

Supplement: supp [file elife_poa_e47918_Figure_5_figure_supplement_2.pdf › elife_poa_e47918_Figure_5_figure_supplement_2.pdf]
